# Supplementary material for: Anti-epileptogenic effect of FC99 and resveratrol
Source: Front Neurosci. 2023 Aug 24;17:1223196. doi: 10.3389/fnins.2023.1223196 (PMC10483398; doi:10.3389/fnins.2023.1223196)
Supplement: Supplementary file 1 [file Table_1.XLSX]

## Sheet: Fig 1A
Mean time of electrographic seizures per hour - P-Value
Groups	Time (h)
	1	2	3	4	5	6	7	8	9	10	11	12	13	14	15	16	17	18	19	20	21	22	23	24
DMSO vs. RESV	ns	ns	ns	ns	ns	ns	ns	ns	ns	ns	*	ns	ns	*	ns	ns	ns	ns	ns	ns	ns	ns	ns	ns
DMSO vs. FC99	ns	*	ns	*	ns	*	ns	ns	ns	*	*	ns	ns	**	ns	**	**	*	ns	*	ns	ns	*	ns
DMSO vs. Sham	ns	**	**	*	*	*	*	*	**	**	***	*	*	**	**	**	***	**	**	**	*	ns	**	**
RESV vs. FC99	ns	ns	ns	ns	ns	ns	ns	ns	ns	ns	ns	ns	ns	ns	ns	ns	ns	ns	ns	ns	ns	ns	ns	ns
RESV vs. Sham	ns	*	ns	ns	ns	ns	ns	ns	ns	ns	ns	ns	ns	ns	*	ns	ns	ns	ns	ns	ns	ns	ns	ns
FC99 vs. Sham	ns	ns	ns	ns	ns	ns	ns	ns	ns	ns	ns	ns	ns	ns	ns	ns	ns	*	ns	ns	ns	ns	ns	ns
Mean time of electrographic seizures per hour - P-Value
Groups	Time (h)
	1	2	3	4	5	6	7	8	9	10	11	12	13	14	15	16	17	18	19	20	21	22	23	24
DMSO vs. RESV	0.7565	0.6567	0.5256	0.7296	0.9922	0.449	0.4234	0.9309	0.5848	0.0658	0.0255	0.9997	0.9999	0.0218	0.8689	0.8315	0.4006	0.5598	0.4405	0.9901	0.8611	0.5116	0.116	0.0596
DMSO vs. FC99	0.2441	0.0211	0.5901	0.0494	0.9825	0.0105	0.0689	0.1674	0.4315	0.0248	0.0237	0.1269	0.436	0.005	0.1536	0.006	0.0012	0.0484	0.0659	0.0447	0.4537	0.1158	0.0178	0.1826
DMSO vs. Sham	0.0844	0.0065	0.0035	0.0438	0.0103	0.0381	0.0152	0.0118	0.0017	0.0052	0.0007	0.0267	0.0113	0.0038	0.0036	0.0013	0.0002	0.0092	0.0073	0.0077	0.0272	0.0639	0.0011	0.0036
RESV vs. FC99	0.9236	0.0669	0.9999	0.4545	0.9552	0.392	0.8989	0.8078	0.9548	0.8712	0.9923	0.2875	0.6375	0.2629	0.565	0.4299	0.4238	0.3679	0.8952	0.2263	0.9442	0.7861	0.9701	0.9456
RESV vs. Sham	0.6081	0.036	0.1782	0.3993	0.1552	0.6637	0.4819	0.3925	0.066	0.1011	0.1136	0.1134	0.1438	0.2913	0.0432	0.1804	0.1296	0.0609	0.3156	0.069	0.1903	0.536	0.2136	0.1217
FC99 vs. Sham	0.652	0.7681	0.2448	0.9921	0.2099	0.9568	0.5928	0.6328	0.4023	0.1925	0.2911	0.1965	0.4178	0.9904	0.2042	0.1964	0.228	0.0131	0.2519	0.1652	0.133	0.9042	0.1274	0.1016
Raw data
Time (hr)	DMSO									RESV							FC99							Sham
01:00:00	149	211	37	105	58	31	50	24	21	43	25	26	25	5	184	0	27	7	0	46	52	63	1	0	0	1	0	86	0	0	0
02:00:00	65	87	92	129	44	34	137	51	45	167	158	19	193	40	149	51	25	24	0	10	65	41	4	0	0	0	0	86	0	0	0
03:00:00	48	115	93	86	146	66	75	12	25	48	36	0	30	5	141	37	54	10	0	3	84	139	8	0	0	0	0	0	0	0	0
04:00:00	51	105	58	197	29	24	135	135	42	25	120	12	153	31	35	15	5	15	0	13	81	10	10	5	109	1	0	0	0	0	0
05:00:00	49	129	44	55	100	37	25	0	79	193	104	0	15	9	87	51	40	53	0	29	45	168	4	0	0	1	1	0	0	0	0
06:00:00	165	86	146	154	54	121	126	71	16	30	105	32	137	3	112	35	75	12	0	14	17	68	3	38	0	0	39	14	86	111	4
07:00:00	55	197	29	280	152	133	117	64	88	153	33	2	37	8	188	20	67	57	0	12	51	99	2	0	14	0	0	2	0	1	111
08:00:00	84	55	100	62	155	100	38	50	23	15	63	26	93	8	185	13	95	16	0	6	25	62	27	0	19	0	77	0	0	14	0
09:00:00	68	154	54	217	151	70	99	63	92	137	60	7	111	9	138	34	31	23	1	35	44	229	0	0	1	0	5	0	0	0	0
10:00:00	237	280	152	101	110	87	116	35	89	37	71	22	107	10	91	18	72	52	0	8	72	43	10	28	32	0	9	0	0	0	0
11:00:00	191	62	155	84	215	77	106	94	114	93	68	8	30	5	45	90	20	62	0	30	66	119	1	46	0	2	9	12	0	1	6
12:00:00	82	217	151	147	41	51	6	99	20	111	58	14	154	30	250	41	58	35	2	18	18	65	6	0	0	0	0	0	43	0	0
13:00:00	68	101	110	82	225	91	75	7	91	107	42	69	159	2	256	44	57	55	1	14	50	166	7	6	0	0	0	86	0	0	0
14:00:00	141	84	215	224	161	34	203	92	40	30	78	3	65	5	64	21	17	22	0	6	32	13	1	77	0	0	1	0	0	1	0
15:00:00	252	147	41	248	142	70	80	162	79	154	161	35	117	17	216	45	37	115	4	4	77	159	7	0	0	0	2	0	0	1	31
16:00:00	178	82	225	153	108	89	91	98	39	159	30	0	160	21	217	9	23	10	64	9	68	20	1	0	0	0	14	0	17	0	0
17:00:00	103	224	161	173	131	74	161	70	112	65	83	31	222	9	123	40	31	62	81	4	26	35	2	0	43	0	17	0	12	0	0
18:00:00	57	248	142	203	45	81	24	127	92	117	96	31	52	6	157	33	33	35	42	21	55	41	1	0	0	4	15	2	0	0	0
19:00:00	176	153	108	282	122	119	57	266	24	160	17	70	68	8	226	2	72	106	1	69	76	54	0	0	0	111	0	0	0	0	0
20:00:00	94	173	131	161	228	55	12	52	82	222	129	7	162	19	67	84	16	77	0	39	43	48	2	4	0	0	0	0	38	0	0
21:00:00	74	203	45	40	38	51	81	13	95	52	31	120	16	5	124	2	65	24	2	51	28	90	0	11	17	0	1	0	0	2	0
22:00:00	128	282	122	37	43	69	162	85	70	68	166	17	115	30	28	23	75	83	17	61	10	38	0	86	12	0	0	0	0	0	115
23:00:00	84	161	228	92	167	81	136	32	162	162	29	9	109	12	5	46	82	15	1	95	60	36	0	1	0	6	2
24:00	170	40	38	93	48	108	126	154	40	16	80	15	63	43	4	2	111	62	0	46	46	28	1	0	0	0	2

## Sheet: Fig 1B
Cummulative time of electrographic seizures per hour - P-Value
Groups	Time (h)
	1	2	3	4	5	6	7	8	9	10	11	12	13	14	15	16	17	18	19	20	21	22	23	24
DMSO vs. RESV	ns	ns	ns	ns	ns	ns	ns	ns	ns	ns	ns	ns	ns	ns	ns	ns	ns	ns	ns	ns	ns	ns	ns	ns
DMSO vs. FC99	ns	*	ns	*	ns	*	*	*	*	*	*	*	*	**	**	**	**	**	**	**	**	**	**	**
DMSO vs. Sham	ns	*	**	**	***	***	***	***	***	***	***	***	***	***	***	****	****	****	****	***	****	****	****	****
RESV vs. FC99	ns	ns	ns	ns	ns	ns	ns	ns	ns	ns	ns	ns	ns	ns	ns	ns	ns	ns	ns	ns	ns	ns	ns	ns
RESV vs. Sham	ns	ns	ns	ns	*	ns	ns	ns	ns	ns	ns	ns	ns	ns	ns	ns	ns	ns	ns	ns	ns	ns	ns	*
FC99 vs. Sham	ns	ns	ns	ns	ns	ns	ns	ns	ns	ns	ns	ns	ns	ns	ns	ns	ns	ns	ns	ns	ns	ns	ns	ns
Cummulative time of electrographic seizures per hour - P-Value
Groups	Time (h)
	1	2	3	4	5	6	7	8	9	10	11	12	13	14	15	16	17	18	19	20	21	22	23	24
DMSO vs. RESV	0.7565	0.9999	0.9733	0.8847	0.95	0.8522	0.7173	0.7236	0.6928	0.5132	0.3473	0.4731	0.5675	0.4229	0.4545	0.4789	0.4536	0.4416	0.4161	0.4436	0.4352	0.4021	0.3449	0.2903
DMSO vs. FC99	0.2441	0.0424	0.0881	0.0317	0.0854	0.032	0.0255	0.0195	0.0366	0.0199	0.0138	0.0124	0.0172	0.0082	0.0094	0.0055	0.0033	0.0026	0.0022	0.0021	0.0024	0.002	0.0015	0.0012
DMSO vs. Sham	0.0844	0.0111	0.0016	0.0011	0.0006	0.0004	0.0007	0.0003	0.0004	0.0003	0.0001	0.0002	0.0001	0.0001	0.0001	0.0001	0.0001	0.0001	0.0001	0.0001	0.0001	0.0001	0.0001	0.0001
RESV vs. FC99	0.9236	0.1869	0.4652	0.3398	0.435	0.3855	0.4615	0.4858	0.5625	0.5758	0.6026	0.5361	0.5394	0.5155	0.514	0.4846	0.4545	0.4411	0.4616	0.4153	0.42	0.4087	0.4129	0.4297
RESV vs. Sham	0.6081	0.0785	0.0848	0.0635	0.047	0.0637	0.0836	0.0957	0.0876	0.084	0.0712	0.073	0.0747	0.0749	0.0694	0.0745	0.0716	0.0689	0.0728	0.0639	0.0596	0.0571	0.0533	0.0489
FC99 vs. Sham	0.652	0.6894	0.3462	0.4138	0.2687	0.4058	0.3801	0.3556	0.3418	0.2979	0.2851	0.2671	0.2757	0.2794	0.2577	0.2219	0.1892	0.1655	0.1444	0.1353	0.1301	0.1276	0.11	0.0979
2-way ANOVA, multiple comparison a=0.05. Tukey ad hoc test correction for multiple comparison

## Sheet: Fig 1C
	DMSO	RESV	FC99	Sham
	886	862	485	102
	1484	631	464	72
	975	300	144	121
	1081	807	386	37
	822	132	344	2
	638	734	370	50
	759	232	6	2
	799			115
	677

## Sheet: Fig 1D
Mean number of electrographic seizures per hour - P-Value
Groups	Time (h)
	1	2	3	4	5	6	7	8	9	10	11	12	13	14	15	16	17	18	19	20	21	22	23	24
DMSO vs. RESV	ns	ns	ns	ns	ns	ns	ns	ns	ns	*	ns	ns	ns	ns	ns	ns	ns	ns	ns	ns	ns	ns	ns	ns
DMSO vs. FC99	ns	*	ns	*	ns	ns	*	ns	ns	**	ns	ns	ns	***	ns	ns	*	ns	ns	*	ns	ns	*	ns
DMSO vs. Sham	ns	*	***	***	***	ns	***	***	***	***	****	***	ns	****	***	**	**	***	**	**	****	ns	****	****
RESV vs. FC99	ns	ns	ns	ns	ns	ns	ns	ns	ns	ns	ns	ns	ns	ns	ns	ns	ns	ns	ns	ns	ns	ns	ns	ns
RESV vs. Sham	ns	ns	*	*	*	ns	*	*	*	ns	ns	**	ns	*	*	ns	ns	ns	*	*	*	ns	*	*
FC99 vs. Sham	ns	ns	ns	*	ns	ns	ns	ns	ns	ns	ns	**	ns	*	ns	ns	ns	ns	ns	ns	*	ns	*	ns
Mean number of electrographic seizures per hour - P-Value
Groups	Time (h)
	1	2	3	4	5	6	7	8	9	10	11	12	13	14	15	16	17	18	19	20	21	22	23	24
DMSO vs. RESV	0.9416	0.5131	0.4576	0.984	0.8245	0.1875	0.9015	0.3104	0.9703	0.0456	0.2493	0.726	0.228	0.2701	0.2846	0.7887	0.2987	0.1714	0.8183	0.5356	0.2678	0.2127	0.1198	0.2595
DMSO vs. FC99	0.3538	0.0324	0.1588	0.0429	0.1379	0.3557	0.0103	0.0802	0.2907	0.0094	0.0726	0.2998	0.177	0.0008	0.4204	0.9134	0.0328	0.1643	0.0677	0.025	0.0807	0.2645	0.0229	0.1323
DMSO vs. Sham	0.1757	0.0222	0.0003	0.0002	0.0004	0.0714	0.0004	0.0001	0.0003	0.0004	0.0001	0.0008	0.0651	0.0001	0.0002	0.0052	0.003	0.0002	0.0017	0.0016	0.0001	0.0682	0.0001	0.0001
RESV vs. FC99	0.7367	0.6033	0.8543	0.2604	0.641	0.9996	0.1653	0.9266	0.3168	0.6871	0.8724	0.1321	0.9999	0.3282	0.9999	0.9999	0.8091	0.9999	0.4798	0.269	0.9076	0.999	0.9507	0.977
RESV vs. Sham	0.3883	0.2066	0.0169	0.0143	0.0268	0.6591	0.0217	0.0395	0.0177	0.0646	0.0642	0.0074	0.7286	0.0353	0.0306	0.0987	0.1737	0.051	0.0408	0.0174	0.0143	0.476	0.0423	0.0287
FC99 vs. Sham	0.8292	0.6492	0.0903	0.0388	0.0947	0.7941	0.102	0.0642	0.1174	0.4265	0.2915	0.0079	0.6651	0.04	0.1075	0.4571	0.285	0.063	0.0734	0.0851	0.0363	0.5831	0.0437	0.0573
Raw data
Time (hr)	DMSO										RESV							FC99							Sham
01:00:00	16	11	12	13	15	6	1	12	1	9	9	15	14	6	8	5	0	5	5	8	0	5	14	1	0	0	1	0	21	0	0	0
02:00:00	22	14	12	11	14	14	9	14	14	6	15	10	17	2	11	5	7	7	6	14	0	6	8	3	0	0	0	0	21	0	0	0
03:00:00	11	17	15	15	11	13	3	5	22	13	12	7	11	0	14	4	12	6	2	14	0	5	14	3	0	0	0	0	0	0	0	0
04:00:00	13	13	15	13	8	11	3	17	12	4	15	19	10	5	11	4	6	5	7	3	0	10	8	3	1	1	1	0	0	0	0	0
05:00:00	13	11	14	13	20	8	0	12	18	10	10	6	19	0	14	7	10	5	6	16	0	5	7	2	0	0	1	1	0	0	0	0
06:00:00	11	15	11	6	15	18	7	11	16	11	7	11	13	3	12	3	5	5	8	19	0	7	11	2	1	0	0	5	5	21	1	1
07:00:00	7	13	8	14	11	22	4	19	16	10	19	12	14	2	8	4	14	8	2	8	0	4	7	2	0	3	0	0	1	0	1	2
08:00:00	19	13	20	9	22	13	5	12	9	13	6	17	16	4	8	4	5	7	5	12	0	9	13	2	0	1	0	2	0	0	4	0
09:00:00	10	6	15	16	8	9	5	18	10	6	11	24	14	4	13	5	10	8	7	15	1	6	4	0	0	1	0	4	0	0	0	0
10:00:00	11	14	11	9	20	14	4	16	17	11	12	8	6	2	8	6	9	8	4	2	0	10	8	5	1	8	0	9	0	0	0	0
11:00:00	12	9	22	12	15	13	5	9	16	13	17	9	9	2	9	4	6	10	2	12	0	6	11	1	3	0	1	7	3	0	1	1
12:00:00	9	16	8	10	14	15	5	1	12	5	24	13	15	4	11	9	11	9	5	5	2	9	9	3	0	0	0	0	0	1	0	0
13:00:00	15	9	20	17	12	10	2	7	16	8	8	7	17	2	4	2	4	5	6	15	1	8	6	4	2	0	0	0	21	0	0	0
14:00:00	12	12	15	8	14	8	7	15	21	9	9	6	17	3	10	2	6	5	4	4	0	7	5	1	1	0	0	1	0	0	1	0
15:00:00	16	10	14	14	17	17	4	8	23	8	13	8	17	4	6	7	2	6	4	23	2	8	9	4	0	0	0	2	0	0	1	1
16:00:00	15	17	12	11	10	16	3	3	11	11	7	14	15	0	11	5	8	7	3	8	30	3	6	1	0	0	0	13	0	3	0	0
17:00:00	21	8	14	16	22	5	4	12	21	10	6	11	18	2	8	2	8	10	2	6	6	9	5	2	0	1	0	13	0	2	0	0
18:00:00	14	14	17	14	18	15	3	6	12	14	8	13	14	5	8	4	3	10	6	11	8	14	4	1	0	0	1	11	1	0	0	0
19:00:00	9	11	10	12	18	5	5	5	21	5	14	12	14	6	3	3	2	3	7	6	1	3	9	0	0	0	2	0	0	0	0	0
20:00:00	5.5	16	22	15	17	15	3	2	14	21	11	10	17	1	11	5	8	8	3	6	0	8	6	1	1	0	0	0	0	5	0	0
21:00:00	11	14	18	10	16	8	3	11	16	10	13	10	11	8	7	3	2	6	10	9	2	7	10	0	1	3	0	1	0	0	1	0
22:00:00	15	12	18	12	9	8	1	17	15	8	12	6	5	6	6	4	12	7	6	11	14	5	6	0	21	2	0	0	0	0	0	1
23:00:00	11.5	15	17	12	15	9	4	22	11.5	15	10	11	4	1	3	7	15	11	9	6	1	8	7	0	1	0	1	2	0	0	0	0
24:00	15	10	16	15	12	12	6	4	17	8	10	14	3	4	8	10	1	6	8	14	0	7	7	1	0	0	0	2	0	0	0	0

## Sheet: Fig 1E
Cummulative number of electrographic seizures per hour - P-Value
Groups	Time (h)
	1	2	3	4	5	6	7	8	9	10	11	12	13	14	15	16	17	18	19	20	21	22	23	24
DMSO vs. RESV	ns	ns	ns	ns	ns	ns	ns	ns	ns	ns	ns	ns	ns	ns	ns	ns	ns	ns	ns	ns	ns	ns	ns	ns
DMSO vs. FC99	ns	ns	ns	*	*	ns	*	*	*	*	*	*	*	*	*	*	*	*	*	*	*	*	**	*
DMSO vs. Sham	ns	ns	**	***	****	****	****	****	****	****	****	****	****	****	****	****	****	****	****	****	****	****	****	****
RESV vs. FC99	ns	ns	ns	ns	ns	ns	ns	ns	ns	ns	ns	ns	ns	ns	ns	ns	ns	ns	ns	ns	ns	ns	ns	ns
RESV vs. Sham	ns	ns	ns	*	*	*	*	*	*	*	*	*	*	*	*	*	*	*	*	*	*	*	*	*
FC99 vs. Sham	ns	ns	ns	ns	ns	ns	ns	ns	ns	ns	ns	ns	ns	ns	ns	*	*	*	*	*	*	*	*	*
Cummulative number of electrographic seizures per hour - P-Value
Groups	Time (h)
	1	2	3	4	5	6	7	8	9	10	11	12	13	14	15	16	17	18	19	20	21	22	23	24
DMSO vs. RESV	0.9876	0.7479	0.4649	0.5435	0.6037	0.5409	0.4684	0.4788	0.6236	0.4885	0.3892	0.436	0.4072	0.3885	0.3558	0.398	0.4091	0.3967	0.3878	0.3793	0.3514	0.3114	0.2667	0.2433
DMSO vs. FC99	0.4701	0.1021	0.0909	0.0408	0.0459	0.0717	0.0356	0.0411	0.0447	0.0272	0.0269	0.0236	0.0263	0.0184	0.025	0.0167	0.0139	0.0142	0.0129	0.0104	0.0108	0.0104	0.0092	0.0104
DMSO vs. Sham	0.2317	0.0771	0.0028	0.0002	0.0001	0.0001	0.0001	0.0001	0.0001	0.0001	0.0001	0.0001	0.0001	0.0001	0.0001	0.0001	0.0001	0.0001	0.0001	0.0001	0.0001	0.0001	0.0001	0.0001
RESV vs. FC99	0.8139	0.7703	0.8055	0.6569	0.6368	0.7545	0.6634	0.6953	0.628	0.6204	0.667	0.6096	0.6743	0.647	0.7103	0.7182	0.7165	0.7436	0.7333	0.7114	0.7242	0.732	0.7316	0.7397
RESV vs. Sham	0.466	0.3629	0.0974	0.0401	0.0302	0.0462	0.037	0.0377	0.0352	0.0317	0.0324	0.026	0.031	0.0321	0.0315	0.0346	0.0387	0.039	0.0386	0.0392	0.0368	0.033	0.0285	0.0248
FC99 vs. Sham	0.8292	0.7304	0.3547	0.1665	0.1063	0.1562	0.1337	0.1117	0.0993	0.0842	0.0933	0.0706	0.0778	0.0711	0.0678	0.0335	0.0296	0.0251	0.0241	0.0242	0.0232	0.0207	0.0193	0.0202

## Sheet: Fig 1F
	DMSO	RESV	FC99	Sham
	100	87	61	24
	132	86	51	6
	106	33	69	4
	127	54	32	29
	77	38	61	1
	29	51	54	7
	79		5	1
	127.5			1
	91
	84

## Sheet: Fig 2A
Raw data for Figure 2A
	Time window	DMSO							RESV							FC99							Sham
	1	0.065663	0.815857	0.889611	0.536286	0.430975	0.369071	0.517966	0.249585	0.288856	0.294756	0.3127	1	0.348875	0.578328	0.073081	0.11736	0.048547	0.365177	0.090685	0.378843	0.087292	0.115245	0.172686	0.090937	0.1346	0.422379	0.179309	0.339428
	2	0.077063	0.134066	0.403225	0.207851	0.85388	0.149017	0.245503	0.092667	0.179766	0.380627	0.329773	0.479486	0.189139	0.672002	0.046819	0.026718	0.112924	0.324291	0.453705	0.152916	0.129637	0.042507	0.119939	0.088464	0.205378	0.087382	0.33187	0.092477
	3	0.112502	0.607692	0.357647	0.916908	0.348552	0.388932	0.312799	0.050945	0.117097	0.481133	0.411374	0.412362	0.197956	0.431497	0.001004	0.055784	0.048024	0.562188	0.208784	0.063358	0.142104	0.048432	0.051024	0.091536	0.330505	0.300618	0.221962	0.203936
	4	0.01497	0.310688	0.105819	0.504961	0.506298	0.182439	0.262869	0.096758	0.104698	0.221397	0.504268	0.634048	0.179627	0.669016	0.012069	0.096877	0.088955	0.798814	0.299001	0.211294	0.110964	0.108382	0.11113	0.102291	0.288932	0.34741	0.171898	0.138873
	5	0.062272	0.440671	0.44632	0.573438	0.381181	0.321984	0.507349	0.278586	0.067925	0.274713	0.307807	0.619742	0.329385	0.383069	0.035321	0.063755	0.073969	0.10978	0.172281	0.37494	0.529425	0.101885	0.047503	0.17457	0.153181	0.315656	0.191567	0.033167
	6	0.05461	0.188182	0.295103	0.300639	0.9026	0.193123	0.280084	0.031886	0.261184	0.544193	0.629089	0.294672	0.299679	0.537543	0.00622	0.247203	0.116006	0.390339	0.121743	0.181491	0.186515	0.070009	0.083838	0.07976	0.229222	0.203854	0.232111	0.118723
	7	0.037421	0.257482	0.868441	0.488716	0.573536	0.468687	0.783193	0.058258	0.108493	0.102334	0.500261	0.42045	0.218778	0.208105	0.016082	0.22858	0.103128	0.164393	0.255931	0.057507	0.110748	0.143199	0.071763	0.068058	0.203055	0.196758	0.129283	0.212956
	8	0.054503	0.188964	0.507761	0.282971	0.278563	0.325163	0.257611	0.025178	0.188186	0.122541	0.223787	0.209987	0.447117	0.258656	0.00517	0.077157	0.030661	0.099984	0.09674	0.187925	0.226688	0.204629	0.083009	0.113604	0.205924	0.350225	0.125218	0.104055
	9	0.022466	0.618532	0.512774	0.712909	0.593434	0.313257	0.204726	0.006026	0.064224	0.480566	0.33258	0.550229	0.245311	0.367	0.014877	0.030818	0.077165	0.37527	0.097432	0.320234	0.433817	0.025873	0.121696	0.057961	0.295176	0.290186	0.218009	0.187211
	10	0.037444	0.715161	0.248336	0.547465	0.572514	0.409899	0.695699	0.017654	0.361275	0.240384	0.225406	0.459603	0.182603	0.6233	0.01615	0.049787	0.180381	0.194447	0.172913	0.189876	0.267066	0.216666	0.040855	0.085672	0.252606	0.128405	0.322374	0.172796
	11	0.030294	0.227697	0.548995	0.180996	0.432085	0.336822	0.564139	0.056333	0.080467	0.29858	0.691983	0.788493	0.430383	0.73096	0.005245	0.009145	0.083533	0.359452	0.412288	0.242397	0.320506	0.122198	0.057697	0.129623	0.23067	0.192058	0.106906	0.268414
	12	0.011225	0.142079	0.488477	1	0.45813	0.291767	0.551553	0.260323	0.128207	0.637324	0.203195	0.701938	0.348641	0.728029	0.013551	0.07704	0.16777	0.158481	0.293103	0.300295	0.075386	0.103007	0.095871	0.195931	0.137318	0.618276	0.069319	0.177889
	13	0.060002	0.252451	0.617958	0.663927	0.518269	0.429257	0.350873	0.00649	0.081549	0.379726	0.680997	0.387529	0.470424	0.724335	0.019028	0.019234	0.041121	0.451204	0.08878	0.208481	0.137123	0.078744	0.143267	0.12327	0.135217	0.169712	0.079846	0.259835
	14	0.094994	0.413689	0.393874	0.775723	0.924715	0.408565	0.464372	0.178605	0.218713	0.314422	0.142915	0.738516	0.548799	0.339749	0.008046	0.034299	0.198531	0.262279	0.135893	0.390324	0.137602	0.087415	0.068493	0.111389	0.14716	0.109373	0.058139	0.166344
	15	0.019557	0.306152	0.434491	0.454375	0.243016	0.181954	0.275643	0.024823	0.123945	0.206679	0.323804	0.606032	0.462853	0.298853	0.00728	0.052757	0.079717	0.065609	0.147077	0.115749	0.346421	0.045823	0.036359	0.141265	0.115457	0.183339	0.219807	0.171814
	16	0.031522	0.459852	0.234739	0.298698	0.311174	0.227598	0.515074	0.010099	0.186471	0.469512	0.74053	0.384955	0.420055	0.21329	0.005477	0.143355	0.082461	0.238697	0.419033	0.063097	0.213362	0.105258	0.050371	0.116699	0.480856	0.575383	0.138473	0.195974
	17	0.039379	0.459526	0.284476	0.40356	0.242753	0.372331	0.30782	0.01809	0.089042	0.263748	0.256029	0.610428	0.487212	0.234239	0.002244	0.147345	0.163392	0.254352	0.626294	0.125054	0.122517	0.045145	0.093884	0.07231	0.407828	0.174611	0.157944	0.242423
	18	0.02368	0.143223	0.674876	0.279505	0.571379	0.213968	0.287732	0.041494	0.102838	0.231036	0.312693	0.347824	0.157475	0.605897	0.011326	0.094984	0.120556	0.232676	0.111907	0.280039	0.558431	0.048229	0.039307	0.037862	0.333316	0.232664	0.145632	0.172667
	19	0.033185	0.199851	0.258199	0.666777	0.2145	0.199194	0.334785	0.047523	0.151687	0.220685	0.482853	0.281786	0.3216	0.252034	0.012018	0.110526	0.253096	0.120993	0.031558	0.184311	0.234597	0.016941	0.091518	0.078063	0.220977	0.24034	0.235575	0.280984
	20	0.015174	0.422077	0.533243	0.534336	0.396633	0.138716	0.391094	0.009291	0.120858	0.352573	0.786199	0.209755	0.34391	0.374397	0.008262	0.118796	0.039408	0.048042	0.200408	0.051308	0.17501	0.026808	0.082698	0.276813	0.190337	0.262055	0.197852	0.169824
	21	0.06735	0.192706	0.382713	0.652395	0.428066	0.269469	0.231845	0.048372	0.237439	0.275023	0.387653	0.285706	0.271319	0.320064	0.006248	0.128573	0.129589	0.202289	0.153335	0.129332	0.13979	0.094313	0.156247	0.110886	0.277486	0.547375	0.121154	0.219742
	22	0.100201	0.500434	0.160783	0.424703	0.492449	0.441038	0.494802	1	0.203416	0.123588	0.470403	0.403013	0.128314	0.410356	0.005793	0.040837	0.091271	0.41785	0.225799	0.128181	0.353687	0.086015	0.195513	0.12028	0.358705	0.361979	0.216985	0.253422
	23	0.065712	0.46406	0.55089	0.845684	0.435908	1	0.425698	0.011543	0.170697	0.29634	0.60867	0.365201	0.230576	0.32065	0.003758	0.172662	0.097214	0.133497	0.3068	0.143682	0.344299	0.10642	0.033891	0.221053	0.478728	0.536725	0.235082	0.044122
	24	0.030609	0.500329	0.477642	0.705034	0.325016	0.48227	0.331599	0.020282	0.135738	0.216395	0.250286	0.317942	0.386827	0.561382	0.012804	0.052461	0.039719	0.060341	0.100442	0.105208	0.161607	0.070444	0.09668	0.088352	0.357374	0.22648	0.100372	0.210983
	25	0.047566	0.373198	0.236599	0.304879	0.775366	0.427646	0.320402	0.047806	0.134784	0.223126	0.431893	0.250345	0.166685	0.49165	0.197846	0.054049	0.065378	0.05992	0.263968	0.071967	0.648269	0.041185	0.289019	0.107163	0.219952	0.338058	0.144587	0.2822
	26	0.017561	0.609306	0.117653	0.527627	0.529314	0.22288	0.287355	0.032317	0.206871	0.522258	0.326136	0.395332	0.264789	0.441455	0.055999	0.049055	0.061561	0.101065	0.117537	0.065891	0.225158	0.129566	0.187711	0.171167	0.517137	0.310063	0.173442	0.29425
	27	0.023036	0.170945	0.263957	0.525912	0.30014	0.278659	0.190809	0.014761	0.25454	0.358965	0.586404	0.260011	0.374378	0.633517	0.017999	0.031294	0.15378	0.475063	0.197373	0.102175	0.254607	0.098686	0.071899	0.078852	0.373792	0.332861	0.159932	0.148664
	28	0.02762	0.149481	0.371648	0.341236	0.710999	0.193765	0.399976	0.013513	0.243674	0.175788	0.506211	0.378972	0.571202	0.721788	0.007177	0.230563	0.093647	0.156736	0.037031	0.13855	0.051374	0.327479	0.047334	0.149692	0.37633	0.194474	0.114065	0.379233
	29	0.018198	0.418591	0.321108	0.203046	0.550507	0.10994	0.557658	0.134457	0.111534	1	0.64293	0.37489	0.306923	0.469243	0.004868	0.071735	0.055549	0.184564	0.180986	0.204619	0.493708	0.716295	0.155268	0.19463	0.497971	0.517843	0.191506	0.282473
	30	0.020334	0.158947	0.401695	0.25036	0.506752	0.202896	0.22835	0.053869	0.077864	0.160561	0.627863	0.504312	0.312134	0.331214	0.025016	0.046293	0.060949	0.28164	0.206255	0.200424	0.215688	0.114123	0.163752	0.162651	0.410584	0.405275	0.312558	0.138558
	31	0.053694	0.2497	0.226305	0.150536	0.506027	0.43817	0.31055	0.021367	0.136818	0.170461	0.594539	0.456583	0.355161	0.521014	0.084066	0.124962	0.029325	0.266571	0.253112	0.374574	0.261936	0.334304	0.197776	0.09064	0.365234	0.264393	0.164296	0.318449
	32	0.073536	0.103569	0.226031	0.572134	0.36711	0.665041	0.669136	0.130643	0.096147	0.340969	0.512316	0.329148	0.207554	0.52833	0.100628	0.045262	0.039382	0.078404	0.124027	0.091753	0.266209	0.084336	0.09516	0.047463	0.095535	0.281575	0.129935	0.513849
	33	0.052189	0.255167	0.595531	0.377627	0.297484	0.40116	0.432494	0.009414	0.139109	0.159536	0.501744	0.806589	0.228596	0.128839	0.027245	0.084525	0.054289	0.19824	0.280091	0.164078	0.152054	0.036731	0.07257	0.115875	0.251212	0.495179	0.254693	0.138458
	34	0.071865	0.157503	0.846089	0.156849	0.492663	0.251413	0.497952	0.040793	0.20139	0.3642	0.827536	0.530814	0.344049	0.401902	0.07687	0.037516	0.062897	0.106427	0.085531	0.068722	0.543437	0.140677	0.088514	0.147422	0.08676	0.167868	0.151649	0.49977
	35	0.012929	0.202811	0.661442	0.465883	0.788606	0.404746	0.265517	0.053185	0.135347	0.390048	0.208279	0.225327	0.379663	0.85105	0.039328	0.092786	0.032469	0.718776	0.165604	0.106222	0.218027	0.121806	0.072359	0.202768	0.379634	0.250285	0.474607	0.389578
	36	0.027078	0.234451	0.694648	0.489072	0.285442	0.280879	0.459995	0.013537	0.182625	0.366407	0.362954	0.350123	0.251318	0.348847	0.008884	0.08371	0.142297	0.259338	0.119727	0.164462	0.12231	0.284514	0.074331	0.084491	0.187347	0.366511	0.341419	0.201423
	37	0.024065	1	0.507902	0.578246	0.467475	0.245104	0.369974	0.019981	0.102716	0.235764	0.320019	0.382222	0.392775	0.333234	0.014964	0.060073	0.145555	0.037673	0.315363	0.206276	0.219545	0.145175	0.158257	0.113779	0.197152	0.349031	0.135778	0.268922
	38	0.063287	0.288185	0.308433	0.396691	0.696165	0.241544	0.523357	0.06995	0.126439	0.526368	0.784869	0.120736	0.125071	1	0.013017	0.134428	0.079694	0.157451	0.232743	0.373132	0.0478	0.140472	0.114784	0.155933	0.206367	0.336373	0.133342	0.577862
	39	0.025452	0.222596	0.597586	0.802886	0.455308	0.42167	0.630922	0.013209	0.110896	0.264112	0.565735	0.537733	0.633949	0.34621	0.003413	0.063908	0.037288	0.256772	0.655568	0.212624	0.616054	0.02691	0.054241	0.079119	0.333663	0.267374	0.054321	0.173115
	40	0.061035	0.183174	0.422552	0.230443	0.445319	0.419094	0.908475	0.039339	0.12303	0.532298	0.540984	0.463662	0.32271	0.720109	0.003129	0.118364	0.106394	0.107552	0.28177	0.133377	0.275378	0.135712	0.076919	0.112328	0.240832	0.283808	0.167793	0.123004

## Sheet: Fig 2B
	Band	Sham		FC99		RESV		DMSO
		Mean	SEM	Mean	SEM	Mean	SEM	Mean	SEM
	0.5-4	0.124789	0.019272	0.025708	0.005873	0.083724	0.025948	0.044531	0.004076
	4-8	0.101628	0.008783	0.088114	0.00914	0.153914	0.01055	0.343476	0.03261
	8-12	0.119766	0.007975	0.09219	0.0082	0.330478	0.026987	0.436889	0.031185
	12-30	0.272738	0.018374	0.245916	0.02782	0.461392	0.028903	0.483282	0.034172
	30-40	0.305855	0.020602	0.218465	0.022213	0.446912	0.029438	0.490258	0.028671
	40-70	0.182765	0.013531	0.181617	0.015796	0.322095	0.019521	0.332978	0.02522
	70-100	0.229197	0.018794	0.253904	0.025127	0.477779	0.031263	0.416194	0.026353
	P-values for Figure 2B
	One-way ANOVA, Multiple comparison correction by Tukey. a=0.05
	0.5-4	Sham	FC99	RESV	DMSO			4-8	Sham	FC99	RESV	DMSO			8-12	Sham	FC99	RESV	DMSO
	Sham		***	ns	**			Sham		ns	ns	****			Sham		ns	****	****
	FC99	0.0002		ns	ns			FC99	0.9534		ns	****			FC99	0.7989		****	****
	RESV	0.2994	0.0673		ns			RESV	0.1838	0.0568		****			RESV	<0.0001	<0.0001		**
	DMSO	0.0043	0.8524	0.3407				DMSO	<0.0001	<0.0001	<0.0001				DMSO	<0.0001	<0.0001	0.0032
	12-30	Sham	FC99	RESV	DMSO			30-40	Sham	FC99	RESV	DMSO			40-70	Sham	FC99	RESV	DMSO
	Sham		ns	****	****			Sham		ns	***	****			Sham		ns	****	****
	FC99	0.9047		****	****			FC99	0.0774		****	****			FC99	>0.9999		****	****
	RESV	<0.0001	<0.0001		ns			RESV	0.0008	<0.0001		ns			RESV	<0.0001	<0.0001		ns
	DMSO	<0.0001	<0.0001	0.9451				DMSO	<0.0001	<0.0001	0.6273				DMSO	<0.0001	<0.0001	0.9776
	70-100	Sham	FC99	RESV	DMSO
	Sham		ns	****	****
	FC99	0.9053		****	****
	RESV	<0.0001	<0.0001		ns
	DMSO	<0.0001	<0.0001	0.3325
